# Supplementary material
Source: ML conference proceedings conference paper supplement (https://openreview.net/forum?id=bqXduvuW5E)
Supplement: supplementary_material [file attachment]

422 **A Appendix**

423 **Hyper-parameters & Training Details** We use the default model hyperparameters, such as  
 424 the number of layers and hidden dimensions, according to the original paper for each base-  
 425 line. The tunable hyperparameters are learning rate, batch size and dropout rate. We use  
 426 grid search to find the best hyperparameters for each model. The learning rate is chosen from  
 427  $\{0.001, 0.0005, 0.0001, 0.00005, 0.00001\}$ , the batch size is chosen from  $\{8, 16, 32\}$ , and the  
 428 dropout rate is chosen from  $\{0.0, 0.1, 0.2, 0.3, 0.4, 0.5\}$ . We find that a learning rate of 0.001,  
 429 a batch size of 8, and a dropout rate of 0.1 produce good results for most models. We train all models  
 430 using the OneCycle scheduler and Adam optimizer for up to 100 epochs, except for PiFold and  
 431 KWDesign. We observe that PiFold and KWDesign achieve satisfactory results when trained for only  
 432 20 epochs. The number of trainable parameters and training time for each model are shown in Table  
 433 5. The training time is measured on a single NVIDIA Tesla A100 GPU.

|             | GraphTrans | StructGNN | GVP             | GCA | AlphaDesign | ProteinMPNN | PiFold | KWDesign |
|-------------|------------|-----------|-----------------|-----|-------------|-------------|--------|----------|
| #GNN Layers | 6          | 6         | 6               | 6   | 10          | 6           | 10     | 10*3     |
| #Hidden dim | 128        | 128       | 128             | 128 | 128         | 128         | 128    | 128      |
| batch size  | 8          | 8         | 2000 (max node) | 8   | 8           | 8           | 8      | 8 or 32  |

**Table 6:** Hyperparameters for each model. Note that KWDesign recycles three times, where ten layers of GNNs are used for each time. GVP has its unique batch sampling strategy, where the maximum number of nodes in a batch is 2000.

434 **Limitation & Boarder Impact** This research proposes a computational benchmark for structure-  
 435 based protein design. However, we do not conduct wet experiments to further validate the results.  
 436 The designed proteins may be unstable or not foldable in real-world applications. As with any new  
 437 technology, there are safety concerns associated with the use of designed proteins. For example,  
 438 using designed proteins as therapeutics may have unintended side effects, or releasing them into the  
 439 environment may have unforeseen ecological impacts. Protein design raises ethical issues, particularly  
 440 in designing proteins with potentially harmful or controversial functions. Nevertheless, we believe  
 441 that protein design has great potential to benefit society and that negative impacts can be eliminated  
 442 through industry regulation and legislation. The proposed benchmark is useful for the community to  
 443 develop new protein design algorithms and to evaluate the performance of existing models.
